# Supplementary material
Source: PubMed Central journal article supplement (PMC4836171)

## Supplemental Material

**Online Table I:** Baseline clinical and biochemical variables by GlycA quartile in JUPITER.

|                        | Quartiles of GlycA, umol/L |                      |                      |                   |
|------------------------|----------------------------|----------------------|----------------------|-------------------|
|                        | <364<br>(n=3,196)          | 364-404<br>(n=3,091) | 404-449<br>(n=3,130) | >449<br>(n=3,110) |
| Age, years             | 66 (60, 71)                | 65 (60, 71)          | 66 (60, 71)          | 66 (61, 71)       |
| Women, %               | 24.0                       | 33.7                 | 40.5                 | 47.1              |
| Race/ethnicity, %      |                            |                      |                      |                   |
| White                  | 86                         | 85                   | 84                   | 73                |
| Black                  | 3.1                        | 4.2                  | 5.9                  | 15                |
| Asian                  | 1.8                        | 1.1                  | 1.4                  | 1.6               |
| Hispanic               | 9.1                        | 8.9                  | 8.4                  | 8.9               |
| Other/unknown          | 0.4                        | 0.7                  | 0.9                  | 1.2               |
| BMI, kg/m <sup>2</sup> | 28 (25, 31)                | 29 (26, 32)          | 29 (26, 33)          | 28 (25, 33)       |
| Hypertension           | 51.1                       | 53.9                 | 58.1                 | 60.8              |
| HbA1c, %               | 5.6 (5.3, 5.8)             | 5.6 (5.4, 5.9)       | 5.7 (5.5, 5.9)       | 5.8 (5.5, 6.0)    |
| hsCRP, mg/L            | 3.0 (2.3, 4.4)             | 3.6 (2.6, 5.4)       | 4.4 (3.1, 6.9)       | 7.1 (4.3, 13.2)   |
| Family history CHD, %  | 12.6                       | 12.5                 | 12.7                 | 12.7              |
| LDL-c, mg/dL           | 109 (95, 119)              | 110 (97, 120)        | 110 (96, 120)        | 107 (92, 118)     |
| HDL-c, mg/dL           | 50 (41, 61)                | 49 (41, 60)          | 49 (41, 60)          | 49 (40, 60)       |
| Triglycerides, mg/dL   | 101 (74, 140)              | 114 (83, 162)        | 124 (91, 180)        | 129 (94, 186)     |
| Smoker*, %             | 10.3                       | 13.7                 | 15.5                 | 20.8              |
| Alcohol†, %            | 23.9                       | 23.7                 | 21.9                 | 18.1              |

**Abbreviations:** BMI = body-mass index, BP = blood pressure, CHD = coronary heart disease, hsCRP = high sensitivity C-reactive protein, LDL-c = low density cholesterol. Data presented as median (25<sup>th</sup>, 75<sup>th</sup> percentile) otherwise as percent where indicated. \*Current or former. †Alcohol consumption  $\geq 1$  drink/day. By Wilcoxon rank sum or  $\chi^2$  test,  $p \leq 0.01$  except for HDL ( $p=0.10$ ) and family history of CHD ( $p=0.99$ ).

**Online Table II:** Hazard ratios per-standard deviation increment associated with GlycA and hsCRP and mortality in JUPITER based on 12-month (on-treatment) measurement of GlycA and hsCRP after 12 months' of rosuvastatin 20 mg (N= 4,926 participants with 52 deaths).

|                                             | HR (95% CI)       | P-value |
|---------------------------------------------|-------------------|---------|
| <b>GlycA</b>                                |                   |         |
| <b>All-Cause Mortality</b>                  |                   |         |
| Unadjusted                                  | 1.85 (1.59, 2.15) | <0.0001 |
| Adjusted for clinical variables*            | 1.70 (1.42, 2.04) | <0.0001 |
| Adjusted for clinical variables*( and CRP** | 1.67 (1.36, 2.06) | <0.0001 |
| <b>hsCRP</b>                                |                   |         |
| <b>All-Cause Mortality</b>                  |                   |         |
| Unadjusted                                  | 1.37 (1.15, 1.64) | 0.001   |
| Adjusted for clinical variables*            | 1.31 (1.08, 1.58) | 0.005   |
| Adjusted for clinical variables* and GlycA  | 1.04 (0.85, 1.27) | 0.728   |

**Abbreviations:** CI = confidence interval, HR = hazard ratio, hsCRP = high sensitivity C-reactive protein.  
 \*Models adjusted for age, race, family history of coronary heart disease, hypertension, smoking, alcohol use, body mass index, HbA1c, LDLc, HDLc, log-transformed triglycerides, and randomization arm.  
 \*\*Natural log-transformed.

**Online Table III:** All-cause mortality risk at times of biomarker (GlycA or hsCRP) discordance: risk associated with GlycA when hsCRP is <25<sup>th</sup> percentile and for hsCRP when GlycA is <25<sup>th</sup> percentile, in WHS.

|                                                                                             | Q1                       | Q2                          | Q3                        | Q4                     | P for trend |
|---------------------------------------------------------------------------------------------|--------------------------|-----------------------------|---------------------------|------------------------|-------------|
| <b>HR (95% CI) for GlycA among individuals in the lowest quartile† of hsCRP (N=6,918)</b>   |                          |                             |                           |                        |             |
|                                                                                             | <326 µmol/L<br>(n=3,832) | 326-369 µmol/L<br>(n=1,940) | 369-416 µmol/L<br>(n=888) | >416 µmol/L<br>(n=258) |             |
| <b>All-Cause Mortality (647 deaths)</b>                                                     |                          |                             |                           |                        |             |
| Unadjusted                                                                                  | Ref.                     | 1.19 (0.99, 1.44)           | 1.72 (1.38, 2.13)         | 2.76 (2.05, 3.73)      | <0.0001     |
| Model 1                                                                                     | Ref.                     | 0.96 (0.79, 1.17)           | 1.28 (1.01, 1.63)         | 1.49 (1.05, 2.11)      | 0.013       |
| <b>CVD Mortality (104 deaths)</b>                                                           |                          |                             |                           |                        |             |
| Unadjusted                                                                                  | Ref.                     | 0.70 (0.42, 1.16)           | 1.35 (0.79, 2.32)         | 2.89 (1.48, 5.66)      | 0.031       |
| Model 1                                                                                     | Ref.                     | 0.48 (0.28, 0.83)           | 0.74 (0.40, 1.37)         | 0.75 (0.32, 1.75)      | 0.220       |
| <b>Cancer Mortality (208 deaths)</b>                                                        |                          |                             |                           |                        |             |
| Unadjusted                                                                                  | Ref.                     | 1.09 (0.79, 1.50)           | 1.51 (1.03, 2.21)         | 1.87 (1.03, 3.40)      | 0.010       |
| Model 1                                                                                     | Ref.                     | 0.99 (0.70, 1.39)           | 1.37 (0.90, 2.09)         | 1.52 (0.77, 3.00)      | 0.119       |
| <b>HR (95% CI) for hsCRP** among individuals in the lowest quartile† of GlycA (N=6,996)</b> |                          |                             |                           |                        |             |
|                                                                                             | <0.81 mg/L<br>(n=3,832)  | 0.81-2.1 mg/L<br>(n=2,013)  | 2.1-4.4 mg/L<br>(n=869)   | >4.4 mg/L<br>(n=282)   |             |
| <b>All-Cause Mortality (664 deaths)</b>                                                     |                          |                             |                           |                        |             |
| Unadjusted                                                                                  | Ref.                     | 1.41 (1.18, 1.68)           | 1.63 (1.31, 2.03)         | 1.81 (1.28, 2.54)      | <0.0001     |
| Model 1                                                                                     | Ref.                     | 1.08 (0.90, 1.31)           | 1.01 (0.79, 1.29)         | 1.05 (0.72, 1.52)      | 0.790       |
| <b>CVD Mortality (103 deaths)</b>                                                           |                          |                             |                           |                        |             |
| Unadjusted                                                                                  | Ref.                     | 0.82 (0.51, 1.32)           | 1.21 (0.68, 2.13)         | 1.79 (0.82, 3.93)      | 0.297       |
| Model 1                                                                                     | Ref.                     | 0.60 (0.36, 1.01)           | 0.69 (0.37, 1.29)         | 0.99 (0.42, 2.34)      | 0.378       |
| <b>Cancer Mortality (237 deaths)</b>                                                        |                          |                             |                           |                        |             |
| Unadjusted                                                                                  | Ref.                     | 1.55 (1.16, 2.06)           | 1.92 (1.35, 2.74)         | 0.83 (0.36, 1.88)      | 0.005       |
| Model 1                                                                                     | Ref.                     | 1.37 (1.01, 1.86)           | 1.51 (1.02, 2.23)         | 0.64 (0.27, 1.50)      | 0.467       |

**Abbreviations:** CI = confidence interval, HR = hazard ratio, hsCRP = high sensitivity C-reactive protein. Model 1 is adjusted for age, race, family history of myocardial infarction, hypertension, smoking, alcohol use ( $\geq 1$  drink/day), body mass index, HbA1c, LDLc, HDLc, log-transformed triglycerides, and randomization arm. Further adjustment of GlycA and hsCRP (Model 2) for each other produced no appreciable change in the results. \*During maximal follow-up. \*\*Natural-log transformed for regression analyses. †For consistency, quartiles are used in the primary analyses.

**Online Figure I:** Schematic example of tri-antennary N-acetyl linked glycan chain, with N-acetylglucosamine (GlcNAc) contributing to the GlycA signal (red box). GlycA identifies bi-, tri-, and tetra-antennary N-linked glycan chains with  $\beta 1 \rightarrow 2$  and  $\beta 1 \rightarrow 6$  mannose-GlcNAc linkage. Asparagine represents the universal amino acid site for N-glycosylation. (Modified from Otvos *et al. Clinical Chemistry* 2015.<sup>10</sup>)

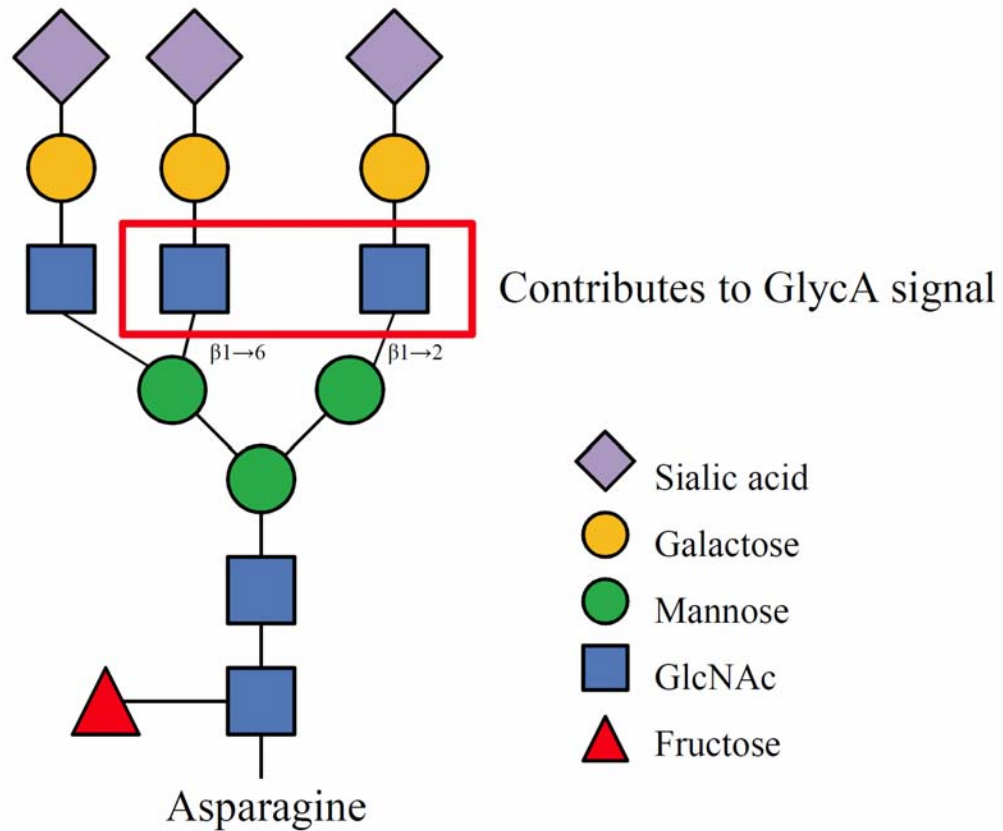

**Online Figure II:** Median (25<sup>th</sup>, 75<sup>th</sup> percentile) percentage change in hsCRP and GlycA after 12 months of rosuvastatin therapy in JUPITER.

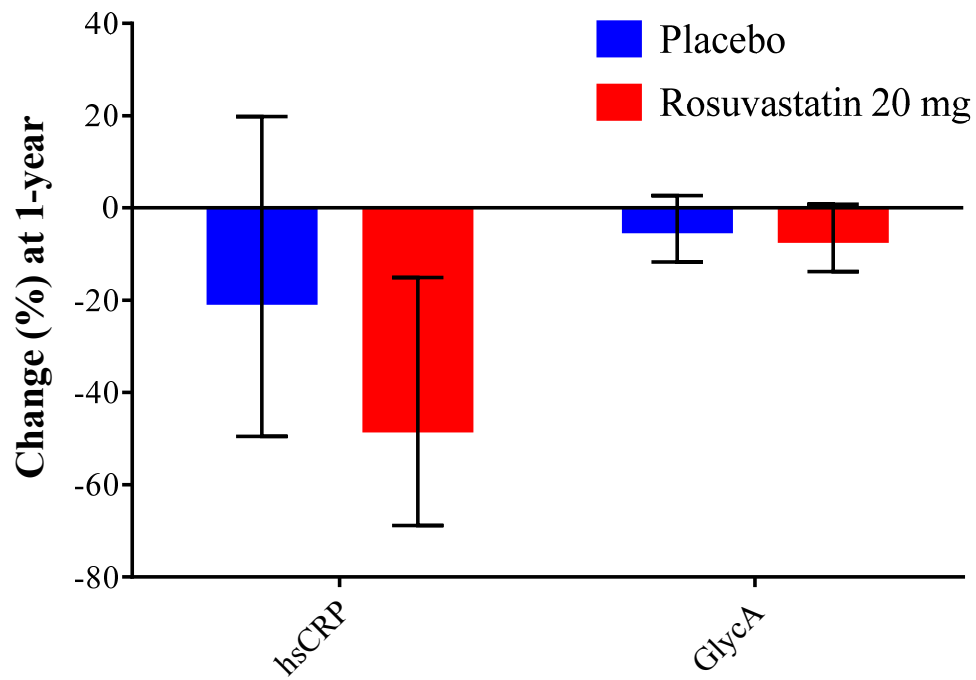

Supplement: NIHMS765965-supplement-308078R2_Online_Data_Supplement.pdf [file NIHMS765965-supplement-308078R2_Online_Data_Supplement.pdf]
